# Supplementary material for: Protodecarboxylation of carboxylic acids over heterogeneous silver catalysts
Source: Royal Society of Chemistry journal article supplement (doi:10.1039/c3cy00580a), 2013-10-31
Supplement: c3cy00580a.pdf [file c3cy00580a.pdf]

*Electronic Supplementary information for:*

**Protodecarboxylation of carboxylic acids over heterogeneous silver catalysts**

Xiu Yi Toy,<sup>a</sup> Irwan Iskandar Bin Roslan<sup>a</sup>, Gaik Khuan Chuah<sup>a</sup> and  
Stephan Jaenicke<sup>\*a</sup>

Department of Chemistry, National University of Singapore  
Kent Ridge, Singapore 117543, Singapore

e-mail: [chmsj@nus.edu.sg](mailto:chmsj@nus.edu.sg)

1. X-ray diffractograms of 10 wt. % Ag on different supports
2. Nitrogen adsorption and desorption isotherms for Al<sub>2</sub>O<sub>3</sub>-supported Ag catalysts with 5 to 20 wt % loading. (Inset: pore size distribution curves).
3. Powder x-ray diffraction patterns of (a) calcined Al<sub>2</sub>O<sub>3</sub> support (b) 5 (c) 10 (d) 15 and (e) 20 wt % Ag/Al<sub>2</sub>O<sub>3</sub>
4. TEM images of 5-20 wt. % Ag/Al<sub>2</sub>O<sub>3</sub>
5. XPS spectra of 5-20 wt. % Ag/Al<sub>2</sub>O<sub>3</sub>
6. Effect of the amount of K<sub>2</sub>CO<sub>3</sub>
7. Estimation of surface Ag atoms
8. Effect of silver loading on crystallite size and catalytic activity of Ag/Al<sub>2</sub>O<sub>3</sub>

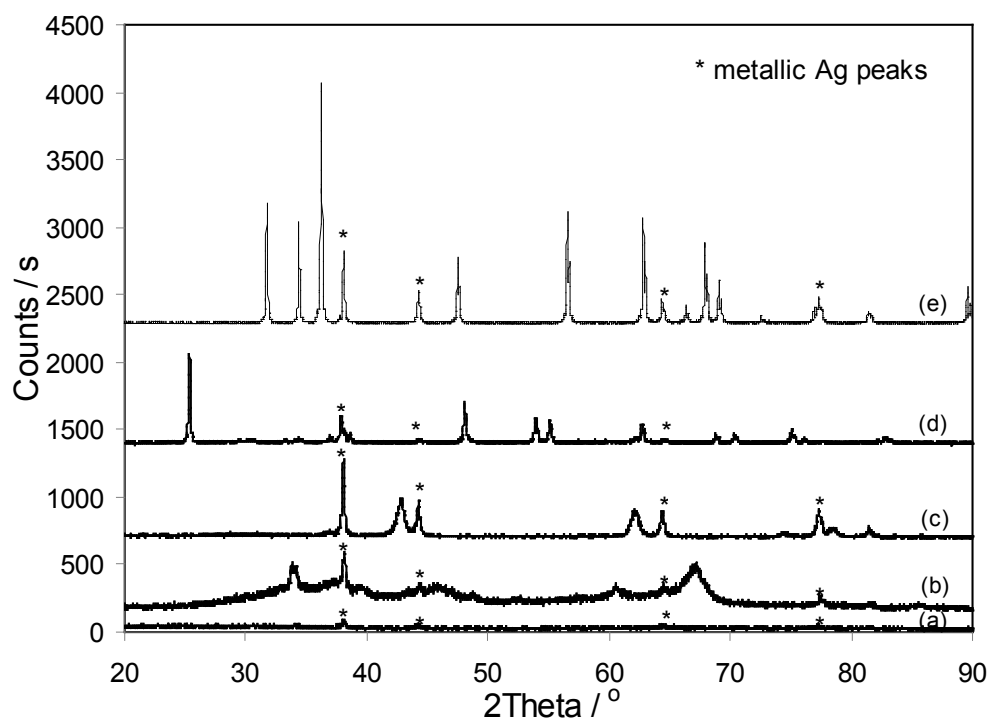

**Fig. S1.** X-ray diffractograms of 10 wt. % Ag supported on (a)  $\text{SiO}_2$  (b)  $\text{Al}_2\text{O}_3$  (c)  $\text{MgO}$  (d)  $\text{TiO}_2$  and (e)  $\text{ZnO}$ .

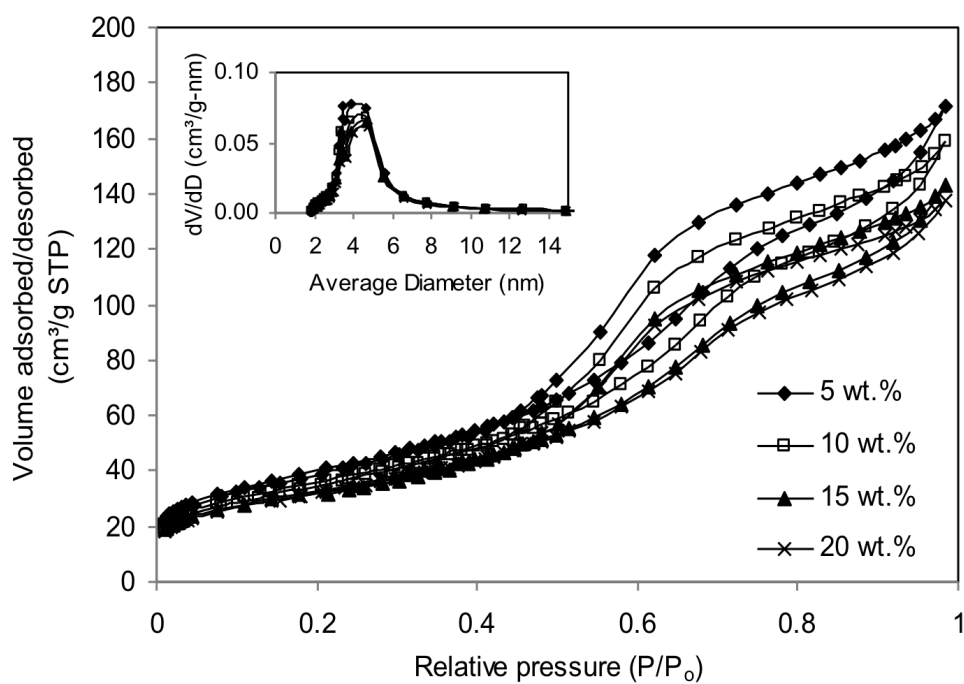

**Fig. S2.** Nitrogen adsorption and desorption isotherms for  $\text{Al}_2\text{O}_3$ -supported Ag catalysts with 5 to 20 wt % loading. (Inset: pore size distribution curves).

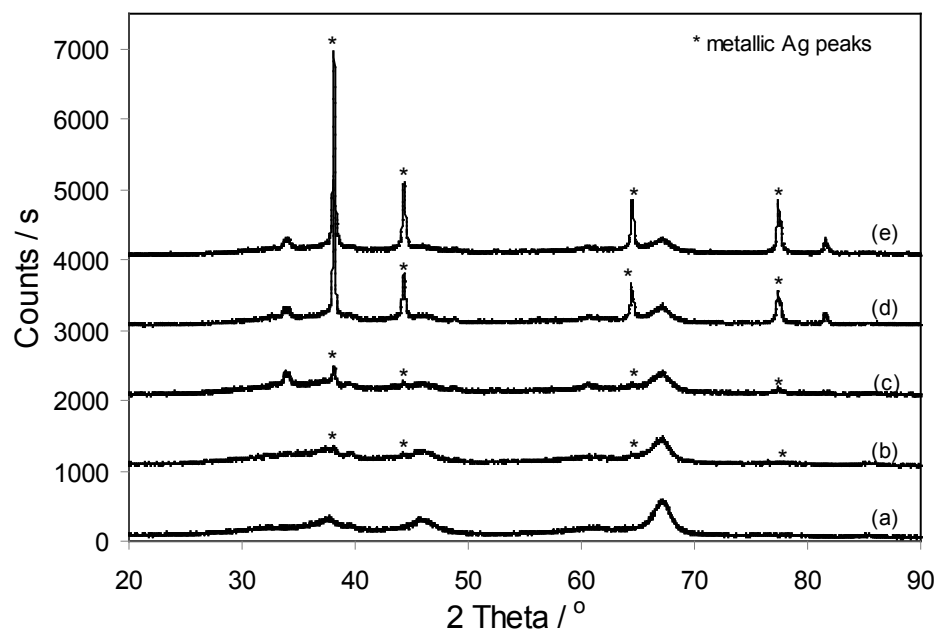

**Fig. S3.** Powder x-ray diffraction patterns of (a) calcined Al<sub>2</sub>O<sub>3</sub> support (b) 5 (c) 10 (d) 15 and (e) 20 wt % Ag/Al<sub>2</sub>O<sub>3</sub> (traces are offset by 1000 counts).

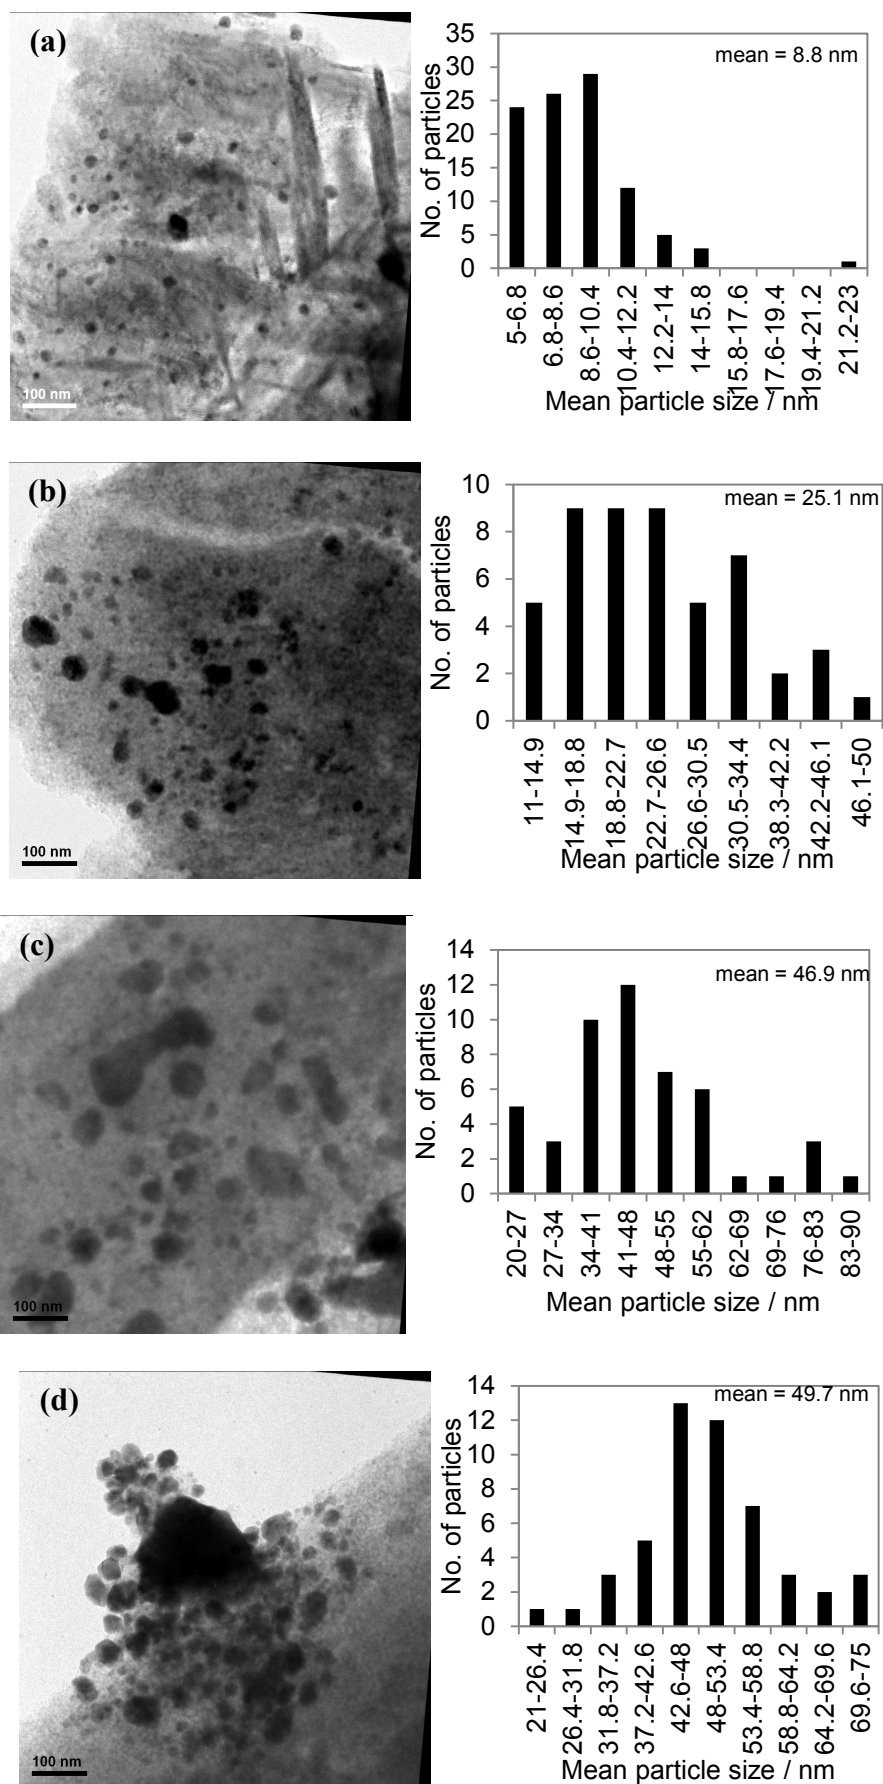

**Fig. S4.** TEM images of (a) 5 wt %, (b) 10 wt %, (c) 15 wt %, (d) 20 wt % Ag/Al<sub>2</sub>O<sub>3</sub>.

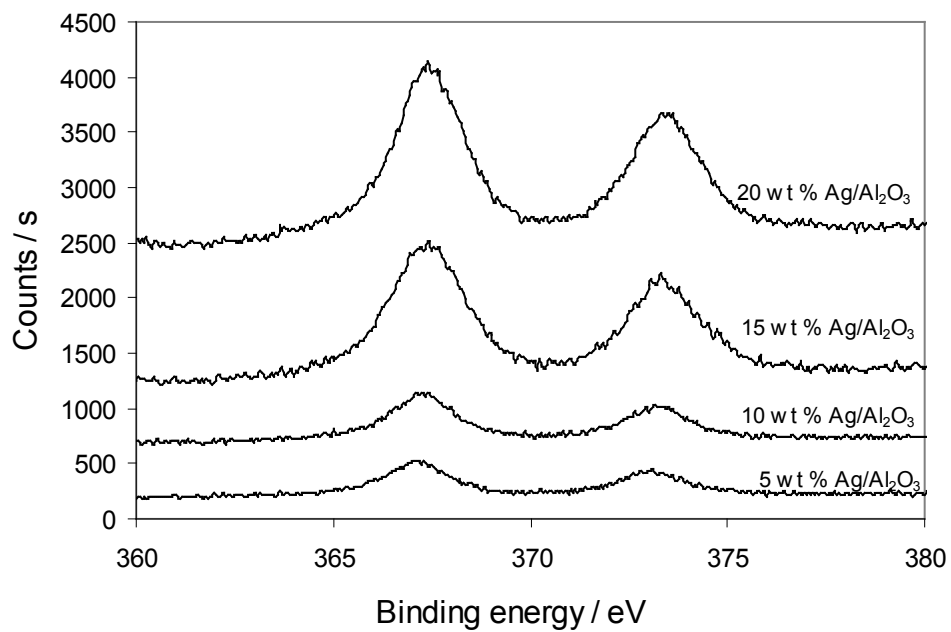

**Fig. S5.** Ag 3d<sub>5/2</sub> photoelectron spectra for 5-15 wt % Ag/Al<sub>2</sub>O<sub>3</sub>.

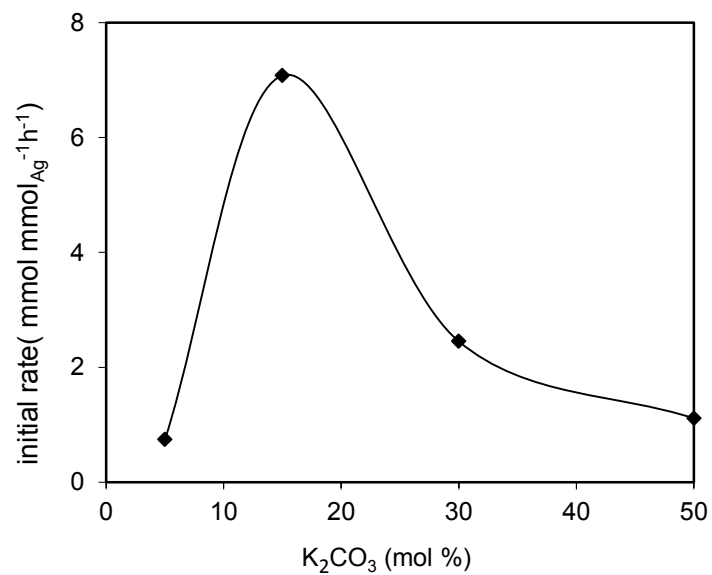

**Fig. S6.** Plot of initial rate versus mol % of  $K_2CO_3$ .

### Estimation of surface Ag atoms

The supported Ag nanoparticles has a *fcc* crystal lattice structure and each atom is surrounded by twelve others, according to a full shell close packing model. The total number of Ag atoms ( $N_T$ ) can be estimated according to equation (1), where  $\langle d \rangle$  correspond to the mean diameter of Ag particles determined experimentally by Scherrer's equation using XRD data and  $d_{at}$  is the atomic diameter of Ag (0.289 nm). Number of shells,  $m$ , can be determined using equation (2) and used to estimate the total number of external atoms,  $N_s$ , according to equation (3).<sup>27,28</sup>

$$\langle d \rangle = 1.105 \times d_{at} \times N_T^{1/3} \quad (1)$$

$$N_T = \frac{(10m^3 - 15m^2 + 11m - 3)}{3} \quad (2)$$

$$N_s = 10m^2 - 20m + 12 \quad (3)$$



**Table S1.** Effect of silver loading on crystallite size and catalytic activity of Ag/Al<sub>2</sub>O<sub>3</sub>

| Ag loading<br>(wt. %)          | Crystallite size<br>(nm) | N <sub>s</sub> x10 <sup>3</sup><br>/particle | N <sub>s,rxn</sub><br>x 10 <sup>18</sup> | Initial rate<br>(mmol.mmol <sub>Ag</sub> <sup>-1</sup> .h <sup>-1</sup> ) | TOF <sup>a</sup><br>(h <sup>-1</sup> ) |
|--------------------------------|--------------------------|----------------------------------------------|------------------------------------------|---------------------------------------------------------------------------|----------------------------------------|
| 5                              | 5                        | 1                                            | 31                                       | 5.1                                                                       | 19.6                                   |
| 10                             | 40                       | 70                                           | 4.3                                      | 7.6                                                                       | 216                                    |
| 15                             | 63                       | 170                                          | 2.8                                      | 3.9                                                                       | 173                                    |
| 20                             | 93                       | 380                                          | 1.8                                      | 1.9                                                                       | 125                                    |
| AgOAc                          | —                        | —                                            | 121                                      | 6.2                                                                       | 6.2                                    |
| Ag <sup>b</sup>                | 2,200 <sup>d</sup>       | 350,000                                      | 0.06                                     | 0.047                                                                     | 90                                     |
| Ag <sup>c</sup>                | 22,000 <sup>d</sup>      | 35,000,000                                   | 0.006                                    | 0.005                                                                     | 94                                     |
| Ag <sub>2</sub> O <sup>b</sup> | 84                       | 310                                          | 4.3                                      | 0.8                                                                       | 43                                     |
| Ag <sub>2</sub> O <sup>c</sup> | 94                       | 390                                          | 3.9                                      | 0.5                                                                       | 32                                     |

Reaction conditions: 2 mmol 2-nitrobenzoic acid, 0.2 mmol Ag, 15 mol % K<sub>2</sub>CO<sub>3</sub>, 4 mL DMA, 120 °C.

<sup>a</sup>with respect to number of surface Ag atoms on the catalyst

<sup>b</sup>ex-Ag<sub>2</sub>CO<sub>3</sub>

<sup>c</sup>commercial source

<sup>d</sup>calculated from BET surface area
